# Supplementary material
Source: HighWire-hosted journal article supplement (doi:10.1101/rna.074179.119)
Supplement: Supplemental_Information.pdf [file Supplemental_Information.pdf]

# Supporting Information

Francesca Cuturello<sup>1</sup>, Guido Tiana<sup>2</sup>, Giovanni Bussi<sup>1</sup>

February 18, 2020

## 1 Supplementary Methods

### 1.1 Alignments

In order to conduct a proper analysis of nucleotide co-evolution, homologous RNA sequences need to be aligned through a process named multiple sequence alignment (MSA). A number of different algorithms have been proposed to this aim. The results of any co-evolutionary analysis will depend on this initial step. We here tested two commonly used MSA algorithms, namely those implemented in *ClustalW* [1] and *Infernal* [2].

MSAs are matrices  $\{\sigma^b\}_{b=1}^B$  of  $B$  homologous RNA sequences that have been aligned through insertion of gaps to have a common length  $N$ , so that each sequence can be represented as  $\sigma^b = \{\sigma_1^b, \dots, \sigma_N^b\}$ . Vector  $\sigma$  has entries from a  $q = 5$  letters alphabet  $\{A, U, C, G, -\}$  coding for nucleotide type, where  $-$  represents a gap.  $F_i(\sigma)$  denotes the empirical frequency of nucleotide  $\sigma$  at position  $i$  and  $F_{ij}(\sigma, \tau)$  the frequency of co-occurrence of nucleotides  $\sigma$  and  $\tau$  at positions  $i$  and  $j$ , respectively:

$$F_i(\sigma) = \frac{1}{B} \sum_{b=1}^B \delta(\sigma_i^b, \sigma) \quad (1)$$

$$F_{ij}(\sigma, \tau) = \frac{1}{B} \sum_{b=1}^B \delta(\sigma_i^b, \sigma) \delta(\sigma_j^b, \tau) \quad (2)$$

Here  $\delta$  is the Kronecker symbol (which equals one if the two arguments coincide and zero elsewhere) and  $\sigma_k^b$  is the nucleotide located at position  $k$  in the  $b$ -th sequence of the MSA. In order to reduce the effect of possible sampling biases in the MSA we adopt the reweighting scheme as in [3] with sequences similarity threshold 0.9. However, we did not find significant difference in test cases where the reweighting scheme was omitted (Supporting Information, Table 5).

### 1.2 Direct coupling analysis

The idea of direct coupling analysis is to infer a global statistical model  $P(\sigma)$  that is able to generate the empirical data (single-site and two-sites frequency

counts) [4], such that

$$F_i(\sigma_i) = \sum_{\{\sigma_k | k \neq i\}} P(\sigma_1, \dots, \sigma_N) \equiv f_i(\sigma_i) \quad (3)$$

$$F_{ij}(\sigma_i, \tau_j) = \sum_{\{\sigma_k | k \neq i, j\}} P(\sigma_1, \dots, \sigma_N) \equiv f_{ij}(\sigma_i, \tau_j) \quad (4)$$

Introducing a set of Lagrange multipliers  $\boldsymbol{\theta} \equiv \{h_i(\sigma), J_{ij}(\sigma, \tau)\}$  to constrain the model averages  $\mathbf{f} \equiv \{f_i(\sigma), f_{ij}(\sigma, \tau)\}$  to the observed frequencies  $\mathbf{F}$ , the maximum entropy distribution over the sequences takes the form

$$P(\{\sigma\}) = \frac{1}{Z} \exp \left( \sum_i h_i(\sigma_i) + \sum_{ij} J_{ij}(\sigma_i, \sigma_j) \right) \quad (5)$$

corresponding to a five-states fully connected Potts model, where

$$Z = \sum_{\{\sigma\}} \exp \left( \sum_i h_i(\sigma_i) + \sum_{ij} J_{ij}(\sigma_i, \sigma_j) \right) \quad (6)$$

is the partition function,  $h_i(\sigma_i)$  are called *local fields*, while  $J_{ij}(\sigma, \tau)$  are called *direct couplings* and can be interpreted as the direct interaction between nucleotides  $\sigma$  and  $\tau$  at positions  $i$  and  $j$ , after disentangling them from the interaction with nucleotides sited at other positions. The partition function requires a sum to be done over all the possible sequences of a given length. For a multiple sequence alignment of length  $N$  nucleotides, this would amount to  $5^N$  different sequences, where 5 includes the 4 nucleobases and the gap. Once parameters  $h_i(\sigma)$  and  $J_{ij}(\sigma, \tau)$  have been determined, the Frobenius norm [3, 5, 6] of the coupling matrices can be used to obtain a scalar value for each pair of positions:

$$S_{ij} = \sqrt{\sum_{\{\sigma, \tau\}} J_{ij}(\sigma, \tau)^2} \quad (7)$$

We will discuss three different approaches that can be used to determine the parameters of the model: the mean-field approximation [4], the pseudo-likelihood maximization [6], and a Boltzmann-learning approach proposed here.

### 1.3 Mean field approximation

In the mean-field approximation, the effect of all nucleotides on any given one is approximated by a single averaged effect, reducing a many-body problem to a one-body problem. The mean-field approach is the one adopted in [4], by which coupling matrices are estimated as the inverse of the connected correlation matrices:  $J_{ij}(\sigma_i, \sigma_j) \simeq -C_{ij}^{-1}(\sigma_i, \sigma_j)$ , where  $C_{ij}(\sigma_i, \sigma_j) = F_{ij}(\sigma_i, \sigma_j) - F_i(\sigma_i)F_j(\sigma_j)$ , and the local fields are estimated as  $h_i(\sigma_i) \simeq$

$\ln \frac{F_i(\sigma_i)}{F_i(\bar{\sigma}_i)} - \sum_{j, j \neq i} \sum_{\substack{\sigma_i, \\ \sigma_i \neq \bar{\sigma}_i}} J_{ij}(\sigma_i, \sigma_j) F_j(\sigma_j)$ , where  $\bar{\sigma}$  is an arbitrarily chosen letter

of the alphabet, usually the one representing gaps. To make the matrix invertible and alleviate finite sample effects it is common to add pseudo-counts as  $\hat{F}_i = (1 - \lambda)F_i + \frac{\lambda}{5}$  and  $\hat{F}_{ij} = (1 - \lambda)F_{ij} + \frac{\lambda}{25}(1 - \delta_{ij}) + \frac{\lambda}{5}\delta_{ij}\delta_{\sigma_i\sigma_j}$ , where  $\lambda = 0.5$  [3].

## 1.4 Pseudo-likelihood maximization

An alternative approach to estimate the DCA inverse problem solution can be that of minimizing the negative pseudo-log likelihood function  $l_{pseudo} = -\frac{1}{B} \sum_r \sum_{b=1}^B \log P(\sigma_r^b | \sigma_{\setminus r}^b)$ . Here  $\sigma_{\setminus r}^b$  denotes the identity of all the nucleotides *except* the one at position  $r$ , and thus  $P(\sigma_r^b | \sigma_{\setminus r}^b)$  is the conditional probability of observing one variable  $\sigma_r$  given all the other variables. When data is abundant, maximizing the conditional likelihood tends to maximizing the full likelihood (see, e.g., [7, 8]). Pseudo-likelihood maximization allows to overcome the intractable evaluation of the full partition function, since calculating the normalization of the conditional probability only requires an empirical average over the dataset. In this paper we will exploit the asymmetric pseudo-likelihood maximization [6] as implemented at <https://github.com/magnusekeberg/plmDCA>.

## 1.5 Gauge invariance and regularization

The number of model parameters in Eq. 5 is  $\frac{N(N-1)}{2}q^2 + Nq$  but the model is over-parametrized, in the sense that distinct parameter sets can describe the same probability distribution. This is because the consistency conditions (Eq. 3) are not independent, single-site marginals being implied by the two-sites marginals and all distributions being normalized; thus the number of independent parameters turns out to be  $\frac{N(N-1)}{2}(q-1)^2 + N(q-1)$  [9]. In order to remove the degeneracy of the mean-field solution so to obtain a unique and reproducible result, a possible *gauge* choice for the Potts model [10, 3] is the one minimizing the norm of couplings matrices (Eq. 7), namely  $\sum_{\{\tau\}} J_{ij}(\sigma, \tau) = \sum_{\{\tau\}} J_{ij}(\tau, \sigma) = \sum_{\{\tau\}} h_i(\tau) = 0, \forall i, j, \sigma, \tau$ . Another possible gauge is the one in which parameters relative to a specific letter of the alphabet  $\bar{\sigma}$  (usually the one representing the gaps) are set to zero:  $J_{ij}(\bar{\sigma}, \tau) = J_{ij}(\tau, \bar{\sigma}) = h_i(\bar{\sigma}) = 0, \forall i, j, \tau$ . In the Boltzmann learning and pseudo-likelihood maximization frameworks, the degeneracy can alternatively be removed by minimizing a function obtained by the addition of an  $l_2$ -regularization term to  $l(\theta)$  [10], such that:

$$\theta = \arg \min_{\theta} \{l(\theta) + R(\theta)\} \quad (8)$$

where  $R(\theta) = \frac{k}{2} \sum_p \theta_p^2$  and  $p = \{1, \dots, \frac{N(N-1)}{2}q^2 + Nq\}$ . For the Boltzmann learning approach we heuristically observed that a regularization is not necessary and that results are not sensitive to the choice of  $k$ , and we thus decided not to use any regularization term. For pseudo-likelihood we used a value of  $k$

depending on the alignment size, using the default options supplied by the employed software. Different prefactors were also tested (see Figure 12).

## 1.6 Mutual information

The mutual information between two positions  $i$  and  $j$  is defined as

$$MI_{ij} = \sum_{\sigma_i, \tau_j} F_{ij}(\sigma_i, \tau_j) \ln \frac{F_{ij}(\sigma_i, \tau_j)}{F_i(\sigma_i)F_j(\tau_j)} \equiv S_{ij} \quad (9)$$

and is a local measure of the mutual dependence between two random variables, quantifying how much the uncertainty about one of the two variables is reduced by knowing the other. It is the simplest possible way to assess covariance [11] and its capability to predict contacts in RNA has been reported to be surpassed by DCA-based methods [3].

## 1.7 Capability of the inferred couplings to reproduce frequencies

The capability of various DCA methods to infer correct parameters for the Potts model can be quantified by computing the root-mean-square deviation (RMSD) between model and observed pair frequencies:

$$RMSD = \sqrt{\langle (f_{ij}(\sigma_i, \tau_j) - F_{ij}(\sigma_i, \tau_j))^2 \rangle_{\{ij\}, \{\sigma_i, \tau_j\}}} \quad (10)$$

For Boltzmann-learning DCA, the model frequencies are calculated in the validation phase of simulations, and the RMSD can be used to assess the convergence of the simulation. For other DCA methods one can simply use the estimated couplings to run a simulation in sequence space.

## 1.8 Validation of the predicted contacts

We perform this analysis on sequences of a number of riboswitches families classified in the Rfam database [12]. Columns with more than 90% of gaps were removed from the alignments in order to make the maximization faster and to avoid overfitting the model on positions of the alignment that are not relevant. The 17 RNA families have been chosen among those for which at least one high-resolution crystallographic structure have been reported, ruling out from the analysis the structures annotated as interacting double chains. A full list is reported in Table 1. The number of nucleotides in each chain ranges between 52 and 161, and the effective number of sequences between 25 and 1078 (all details are reported in Supporting Information, Table 1). The lowest quality structure in the data set has been solved with resolution 2.95Å. Contacts in the reference PDB structures are annotated with DSSR [13], that takes into account all hydrogen bonds and classify base pairs according to the Westhof-Leontis nomenclature [14]. This is different from other works where

the geometric distance between heavy atoms belonging to each nucleotide, thus including also backbone atoms, is used, and is expected to better report on the direct base-base contacts that are supposed to be associated to covariation. We decided to ignore stacking interactions since coevolution in RNA is mostly related to isostericity [15, 16]. All the used MSAs as well as files containing the annotation of each base pair are available at <https://github.com/bussilab/bl-dca>.

Before computing the one-site and two-sites frequencies, the columns of the MSA where the sequence corresponding to the reference crystallographic structure had a gap were eliminated by the alignment. Whereas this step should not be in principle required, preliminary calculations showed that this pruning improves the quality of the results for all the tested DCA methods (data not shown). In addition, we applied to the score of each contact (Eq. SI5) the so-called average-product correction (APC) [17].

Evaluation of the performance of RNA contact prediction methods requires the number of correct predictions (true positives, TP), the number of contacts predicted but absent in the native structure (false positives, FP), and the number of contacts present in the native structure but not predicted (false negatives, FN). Two common measures are sensitivity and precision, where *sensitivity* is the fraction of correctly predicted base pairs of all true base pairs, while *precision* is the fraction of true base pairs of all predicted base pairs:

$$sensitivity = \frac{TP}{TP + FN} \quad (11)$$

$$precision = \frac{TP}{TP + FP} \quad (12)$$

The Matthews correlation coefficient (MCC) can be defined as the geometric average of sensitivity and precision [18, 19]

$$MCC = \sqrt{sensitivity \cdot precision} \quad (13)$$

and is equivalent to the interaction network fidelity [20]. To turn contact scores  $S_{ij}$  (either Eq. SI7, for mutual information, or Eq. SI5, for DCA, or E-values, for R-scape) into predictions it is necessary to assume a threshold  $\bar{S}$ . The predicted contacts will be those scored by a value above (below, for R-scape)  $\bar{S}$ . For R-scape, we used the recommended threshold  $\bar{S} = 0.05$ . For the other methods, we chose the threshold score maximizing the MCC, corresponding to the optimal compromise between precision and sensitivity. For each covariance method, the MCC as a function of the threshold score  $S$  shows a similar behavior for all the  $N_s=17$  systems, their peaks falling at very similar positions. This suggests the possibility to set a unique threshold for each covariance method that maximizes the MCC geometric average over all systems:

$$\bar{S} = \arg \max_S \left( \prod_{\mu}^{N_s} MCC_{\mu}(S) \right)^{\frac{1}{N_s}} \quad (14)$$

Table 1: PDB, RFAMcode molecule name, alignment length and size, effective alignment size after reweighting of the data set.

| <b>PDB</b> | <b>RFAM</b> | <b>molecule name</b>        | <b>length</b> | <b>size</b> | <b>size<sub>eff</sub></b> |
|------------|-------------|-----------------------------|---------------|-------------|---------------------------|
| 4L81       | RF01725     | SAM-I/IV variant riboswitch | 97            | 693         | 128                       |
| 2GDI       | RF00059     | TPP riboswitch              | 80            | 10858       | 1054                      |
| 3F2Q       | RF00050     | FMN riboswitch              | 109           | 3144        | 1078                      |
| 2GIS       | RF00162     | SAM riboswitch              | 93            | 4903        | 910                       |
| 1Y26       | RF00167     | Purine riboswitch           | 71            | 2589        | 508                       |
| 3DOU       | RF00168     | Lysine riboswitch           | 161           | 1870        | 832                       |
| 4QLM       | RF00379     | ydaO/yuaA leader            | 108           | 2723        | 1067                      |
| 2QBZ       | RF00380     | ykoK leader                 | 153           | 850         | 240                       |
| 5T83       | RF00442     | ykkC-yxkD leader            | 89            | 687         | 138                       |
| 3OWI       | RF00504     | Glycine riboswitch          | 88            | 4602        | 985                       |
| 3IRW       | RF01051     | Cyclic di-GMP-I riboswitch  | 91            | 2231        | 578                       |
| 4FRG       | RF01689     | AdoCbl variant RNA          | 84            | 189         | 25                        |
| 3VRS       | RF01734     | Fluoride riboswitch         | 52            | 1426        | 312                       |
| 5DDP       | RF01739     | Glutamine riboswitch        | 61            | 1138        | 179                       |
| 4XW7       | RF01750     | ZMP/ZTP riboswitch          | 64            | 1197        | 432                       |
| 3SD3       | RF01831     | THF riboswitch              | 89            | 547         | 205                       |
| 4RUM       | RF02683     | NiCo riboswitch             | 92            | 207         | 42                        |

Table 2:  $\overline{MCC}$  with optimal covariance score threshold  $\overline{S}$  for Boltzmann learning DCA, pseudo-likelihood DCA, mean field DCA, mutual information for each of 17 RNA families, obtained through cross-validation procedure. Alignments are performed with *Infernal*.

| PDB  | Boltzmann learning DCA |                | Pseudo-likelihood DCA |                | mean field DCA   |                | mutual information |                |
|------|------------------------|----------------|-----------------------|----------------|------------------|----------------|--------------------|----------------|
|      | $\overline{MCC}$       | $\overline{S}$ | $\overline{MCC}$      | $\overline{S}$ | $\overline{MCC}$ | $\overline{S}$ | $\overline{MCC}$   | $\overline{S}$ |
| 3DOU | 0.68                   | 1.09           | 0.59                  | 0.65           | 0.67             | 1.0            | 0.68               | 0.22           |
| 3F2Q | 0.58                   | 1.09           | 0.58                  | 0.65           | 0.56             | 1.0            | 0.55               | 0.22           |
| 2QBZ | 0.55                   | 1.09           | 0.50                  | 0.78           | 0.52             | 1.0            | 0.53               | 0.22           |
| 2GDI | 0.55                   | 1.09           | 0.51                  | 0.65           | 0.57             | 1.0            | 0.48               | 0.22           |
| 1Y26 | 0.69                   | 1.09           | 0.67                  | 0.65           | 0.63             | 0.99           | 0.63               | 0.22           |
| 5T83 | 0.58                   | 1.09           | 0.58                  | 0.65           | 0.58             | 1.0            | 0.53               | 0.22           |
| 5DDP | 0.65                   | 1.09           | 0.63                  | 0.65           | 0.66             | 1.0            | 0.65               | 0.22           |
| 4XW7 | 0.59                   | 1.24           | 0.63                  | 0.65           | 0.59             | 1.0            | 0.55               | 0.22           |
| 4RUM | 0.60                   | 1.19           | 0.39                  | 0.78           | 0.54             | 1.06           | 0.55               | 0.22           |
| 4L81 | 0.46                   | 1.09           | 0.45                  | 0.78           | 0.43             | 1.0            | 0.35               | 0.22           |
| 4FRG | 0.63                   | 1.09           | 0.49                  | 0.78           | 0.50             | 0.99           | 0.64               | 0.22           |
| 3SD3 | 0.67                   | 1.05           | 0.69                  | 0.65           | 0.67             | 1.0            | 0.63               | 0.22           |
| 2GIS | 0.67                   | 1.14           | 0.74                  | 0.65           | 0.44             | 1.03           | 0.37               | 0.22           |
| 3OWI | 0.73                   | 1.11           | 0.73                  | 0.65           | 0.67             | 1.0            | 0.29               | 0.24           |
| 3IRW | 0.58                   | 1.09           | 0.56                  | 0.65           | 0.50             | 1.0            | 0.35               | 0.22           |
| 4QLM | 0.56                   | 1.05           | 0.58                  | 0.65           | 0.49             | 1.0            | 0.43               | 0.22           |
| 3VRS | 0.64                   | 1.11           | 0.71                  | 0.65           | 0.71             | 1.0            | 0.67               | 0.22           |

Table 3: Clustal alignment.  $\overline{MCC}$  with optimal covariance score threshold  $\overline{S}$  for Boltzmann learning DCA, pseudo-likelihood DCA, mean field DCA, mutual information for each of 17 RNA families, obtained through cross-validation procedure.

| PDB  | Boltzmann learning DCA |                | Pseudo-likelihood DCA |                | mean field DCA   |                | mutual information |                |
|------|------------------------|----------------|-----------------------|----------------|------------------|----------------|--------------------|----------------|
|      | $\overline{MCC}$       | $\overline{S}$ | $\overline{MCC}$      | $\overline{S}$ | $\overline{MCC}$ | $\overline{S}$ | $\overline{MCC}$   | $\overline{S}$ |
| 3DOU | 0.47                   | 1.07           | 0.45                  | 0.43           | 0.42             | 0.82           | 0.47               | 0.20           |
| 3F2Q | 0.48                   | 0.99           | 0.45                  | 0.43           | 0.32             | 0.80           | 0.31               | 0.20           |
| 2QBZ | 0.49                   | 1.07           | 0.46                  | 0.51           | 0.45             | 0.80           | 0.39               | 0.20           |
| 2GDI | 0.44                   | 1.07           | 0.35                  | 0.47           | 0.35             | 0.82           | 0.29               | 0.20           |
| 1Y26 | 0.57                   | 1.07           | 0.50                  | 0.43           | 0.51             | 0.82           | 0.32               | 0.20           |
| 5T83 | 0.41                   | 1.07           | 0.38                  | 0.43           | 0.32             | 0.82           | 0.44               | 0.20           |
| 5DDP | 0.42                   | 1.10           | 0.33                  | 0.51           | 0.19             | 0.82           | 0.20               | 0.20           |
| 4XW7 | 0.38                   | 1.07           | 0.42                  | 0.43           | 0.22             | 0.80           | 0.19               | 0.20           |
| 4RUM | 0.46                   | 1.07           | 0.32                  | 0.51           | 0.24             | 0.80           | 0.37               | 0.20           |
| 4L81 | 0.27                   | 1.07           | 0.29                  | 0.45           | 0.18             | 0.80           | 0.16               | 0.20           |
| 4FRG | 0.59                   | 1.07           | 0.44                  | 0.57           | 0.34             | 0.82           | 0.40               | 0.20           |
| 3SD3 | 0.71                   | 1.07           | 0.72                  | 0.45           | 0.58             | 0.8            | 0.50               | 0.20           |
| 2GIS | 0.54                   | 0.99           | 0.54                  | 0.43           | 0.40             | 0.82           | 0.34               | 0.20           |
| 3OWI | 0.42                   | 1.07           | 0.48                  | 0.47           | 0.40             | 0.82           | 0.24               | 0.20           |
| 3IRW | 0.55                   | 1.07           | 0.37                  | 0.44           | 0.39             | 0.80           | 0.25               | 0.20           |
| 4QLM | 0.38                   | 1.07           | 0.45                  | 0.51           | 0.30             | 0.80           | 0.10               | 0.23           |
| 3VRS | 0.55                   | 1.08           | 0.42                  | 0.43           | 0.42             | 0.82           | 0.34               | 0.20           |

Table 4: Average  $\overline{MCC}$  at optimal covariance score threshold for DCA methods with and without APC correction. Alignments are performed with *Infernal*.

|                          | <b>Boltzmann learning DCA</b> |        | <b>Pseudo-likelihood DCA</b> |        | <b>mean field DCA</b> |        |
|--------------------------|-------------------------------|--------|------------------------------|--------|-----------------------|--------|
|                          | APC                           | no APC | APC                          | no APC | APC                   | no APC |
| average $\overline{MCC}$ | 0.61                          | 0.59   | 0.59                         | 0.56   | 0.57                  | 0.54   |

Table 5: Reweighting scheme: two sequences are considered similar if the fraction of positions with coincident nucleotides (*similarity*) is larger than a given similarity threshold  $x$ :  $n_b = |\{s \in \{1, \dots, B\} : \text{similarity}(\sigma^s, \sigma^b) > x\}|$ . The inverse of  $n_b$ ,  $\omega_b = \frac{1}{n_b}$ , gives a weight for the sequence contribution to frequencies ( $B_{eff} = \sum_{b=1}^B \omega_b$  is then the effective number of sequences in the alignment). In this table we report the average  $\overline{MCC}$  at optimal covariance score threshold for pseudo-likelihood DCA in the reweighting scheme adopting different similarity thresholds  $x$ . Alignments are performed with *Infernal*.

|                          | <b>x=0.7</b> | <b>x=0.8</b> | <b>x=0.9</b> | <b>x=1.0</b> |
|--------------------------|--------------|--------------|--------------|--------------|
| average $\overline{MCC}$ | 0.59         | 0.59         | 0.59         | 0.59         |

Table 6: Non-canonical tertiary contacts predicted via Boltzmann learning DCA on Infernal alignments.

| PDB  | Total non-canonical contacts | Predicted non-canonical contacts | Type of base pairing |
|------|------------------------------|----------------------------------|----------------------|
| 1Y26 | 12                           | 1                                | cSS                  |
| 2GDI | 14                           | 1                                | tSS                  |
| 2GIS | 14                           | 4                                | cSS,tSH,c.H,tWS      |
| 2QBZ | 30                           | 1                                | tSH                  |
| 3DOU | 21                           | 5                                | t.H,tSS,tSH,tHS,tHS  |
| 3F2Q | 17                           | 3                                | tHS,cSS,cHW          |
| 3IRW | 11                           | 0                                | -                    |
| 3OWI | 11                           | 1                                | tHS                  |
| 3VRS | 5                            | 0                                | -                    |
| 5SD3 | 10                           | 1                                | tHS                  |
| 4FRG | 11                           | 0                                | -                    |
| 4L81 | 15                           | 0                                | -                    |
| 4RUM | 7                            | 0                                | -                    |
| 4QLM | 15                           | 4                                | tSH,tSH,cSS,tHS      |
| 4XW7 | 5                            | 0                                | -                    |
| 5DDP | 11                           | 1                                | ...                  |
| 5T83 | 21                           | 3                                | t.H, tSH,tHW         |

Table 7: Total stacked false positives (base atoms distance  $< 3.5 \text{ \AA}$  in the pdb reference structure) over total false positives for all methods. (*Infernal* alignment).

|                 | <b>Boltzmann<br/>learning</b> | <b>Pseudo-<br/>likelihood<br/>DCA</b> | <b>Mean Field</b> | <b>Mutual In-<br/>formation</b> |
|-----------------|-------------------------------|---------------------------------------|-------------------|---------------------------------|
| stacked FP / FP | 0.43                          | 0.46                                  | 0.39              | 0.39                            |

Table 8:  $\overline{MCC}$  for each of 17 RNA families obtained through cross-validation procedure with optimal probability threshold  $\overline{S}$ . Base pairing probabilities are calculated from the RNAfold program available in the ViennaRNA package. We notice that for PDB 5T83 the MCC is zero for thresholds larger than  $\approx 0.5$ , leading to a very low  $\overline{S}$  whenever that system is included in the training set.

| PDB  | $\overline{MCC}$ | $\overline{S}$ |
|------|------------------|----------------|
| 3DOU | 0.51             | 0.25           |
| 3F2Q | 0.52             | 0.25           |
| 2QBZ | 0.52             | 0.25           |
| 2GDI | 0.52             | 0.25           |
| 1Y26 | 0.51             | 0.25           |
| 5T83 | 0.58             | 0.72           |
| 5DDP | 0.51             | 0.25           |
| 4XW7 | 0.51             | 0.25           |
| 4RUM | 0.50             | 0.25           |
| 4L81 | 0.51             | 0.25           |
| 4FRG | 0.53             | 0.26           |
| 3SD3 | 0.52             | 0.25           |
| 2GIS | 0.51             | 0.25           |
| 3OWI | 0.50             | 0.25           |
| 3IRW | 0.53             | 0.25           |
| 4QLM | 0.52             | 0.25           |
| 3VRS | 0.54             | 0.25           |

Table 9: *Infernal* alignment.  $\overline{MCC}$  for each of 17 RNA families obtained through cross-validation procedure with optimal E-value threshold  $\overline{S}$  and  $MCC$  at default R-scape threshold (E-value=0.05). E-values for base pairs are calculated from the R-scape program.

| PDB  | $\overline{S}$ | $\overline{MCC}$ at $\overline{S}$ | $MCC$ at $S = 0.05$ |
|------|----------------|------------------------------------|---------------------|
| 3DOU | 0.5            | 0.51                               | 0.56                |
| 2GIS | 0.5            | 0.59                               | 0.55                |
| 1Y26 | 0.5            | 0.48                               | 0.56                |
| 3VRS | 0.1            | 0.4                                | 0.4                 |
| 2GDI | 0.5            | 0.53                               | 0.56                |
| 5T83 | 0.5            | 0.57                               | 0.53                |
| 4FRG | 0.5            | 0.64                               | 0.62                |
| 4L81 | 0.5            | 0.41                               | 0.42                |
| 2QBZ | 0.5            | 0.54                               | 0.53                |
| 3F2Q | 0.5            | 0.60                               | 0.52                |
| 4QLM | 0.5            | 0.44                               | 0.46                |
| 3IRW | 0.5            | 0.40                               | 0.44                |
| 5DDP | 0.3            | 0.53                               | 0.5                 |
| 4RUM | 0.5            | 0.64                               | 0.62                |
| 3SD3 | 0.5            | 0.61                               | 0.63                |
| 3OWI | 0.5            | 0.58                               | 0.60                |
| 4XW7 | 0.5            | 0.51                               | 0.55                |

Table 10: *ClustalW* alignment.  $\overline{MCC}$  for each of 17 RNA families obtained through cross-validation procedure with optimal E-value threshold  $\overline{S}$  and  $MCC$  at default R-scape threshold (E-value=0.05). E-values for base pairs are calculated from the R-scape program. We notice that for PDB 5DDP and 2GIS the MCC is zero for E-value thresholds smaller than 10.

| PDB  | $\overline{S}$ | $\overline{MCC}$ at $\overline{S}$ | $MCC$ at $S = 0.05$ |
|------|----------------|------------------------------------|---------------------|
| 3DOU | 1.3            | 0.40                               | 0.45                |
| 2GIS | -              | 0.0                                | 0.0                 |
| 1Y26 | 1.3            | 0.35                               | 0.16                |
| 3VRS | 1.3            | 0.27                               | 0.22                |
| 2GDI | 1.3            | 0.44                               | 0.44                |
| 5T83 | 1.3            | 0.42                               | 0.42                |
| 4FRG | 1.3            | 0.47                               | 0.44                |
| 4L81 | 1.3            | 0.18                               | 0.19                |
| 2QBZ | 1.3            | 0.44                               | 0.46                |
| 3F2Q | 1.3            | 0.43                               | 0.40                |
| 4QLM | 1.3            | 0.16                               | 0.20                |
| 3IRW | 1.1            | 0.23                               | 0.28                |
| 5DDP | -              | 0.0                                | 0.0                 |
| 4RUM | 1.1            | 0.45                               | 0.28                |
| 3SD3 | 1.3            | 0.58                               | 0.58                |
| 3OWI | 2.8            | 0.18                               | 0.21                |
| 4XW7 | 1.3            | 0.32                               | 0.25                |

Table 11:  $\overline{MCC}$  for each of 17 RNA families obtained considering as contact predictions the top  $N/2$  coupling scores (where  $N$  is the sequence length). Average MCC is 0.53. Infernal alignments.

| PDB  | $\overline{MCC}$ |
|------|------------------|
| 4L81 | 0.58             |
| 2GDI | 0.50             |
| 3F2Q | 0.56             |
| 2GIS | 0.49             |
| 1Y26 | 0.56             |
| 3DOU | 0.43             |
| 4QLM | 0.51             |
| 2QBZ | 0.50             |
| 5T83 | 0.31             |
| 3OWI | 0.53             |
| 3IRW | 0.69             |
| 4FRG | 0.56             |
| 3VRS | 0.41             |
| 5DDP | 0.49             |
| 4XW7 | 0.57             |
| 3SD3 | 0.61             |
| 4RUM | 0.51             |

Table 12: Contact prediction via Boltzmann learning DCA on ribosomal RNA subunits 58S and 5S (PDB 1FFK and 2WW9), tRNA (PDB 1ASY) and U4 spliceosomal RNA (PDB 2N7M). MCC obtained at optimal score threshold 1.06. Infernal alignments.

| PDB  | RFAM    | molecule name       | length | size   | MCC  |
|------|---------|---------------------|--------|--------|------|
| 1FFK | RF00001 | 5S ribosomal RNA    | 122    | 139785 | 0.49 |
| 2WW9 | RF00002 | 58S ribosomal RNA   | 63     | 4727   | 0.35 |
| 1ASY | RF00005 | tRNA                | 75     | 100000 | 0.74 |
| 2N7M | RF00015 | U4 spliceosomal RNA | 92     | 7670   | 0.38 |

---

**Algorithm 1** Boltzmann learning direct coupling analysis

---

**1. Initialization:**

- Choose randomly 20 sequences from the MSA.
- Initialize model parameters  $\{h, J\}$  to zero.

**2. Learning:** Loop over 100000 Monte Carlo sweeps. For each sweep:

- Loop over the 20 sequences. For each sequence  $k$ :
  - Loop over nucleotide of each sequence. For each nucleotide  $i$ :
    - \* Propose a new random nucleotide at position  $i$
    - \* Compute the acceptance as  $\alpha = \left(1, \frac{P_{new}}{P_{old}}\right)$ , where  $P_{new}$  and  $P_{old}$  are the probabilities of old and new nucleotides at position  $i$  according to model parameters  $\{h, J\}$ .
    - \* Accept/reject comparing  $\alpha$  with a uniform random number in  $[0, 1)$ .
  - Compute frequencies on the 20 sequences.
- Update parameters  $\{h, J\}$  estimating likelihood gradient based on current frequencies.

**3. Validation:** Repeat step 2 using parameters  $\{h, J\}$  computed as averages over the last 5000 Monte Carlo sweeps of step 2.

---

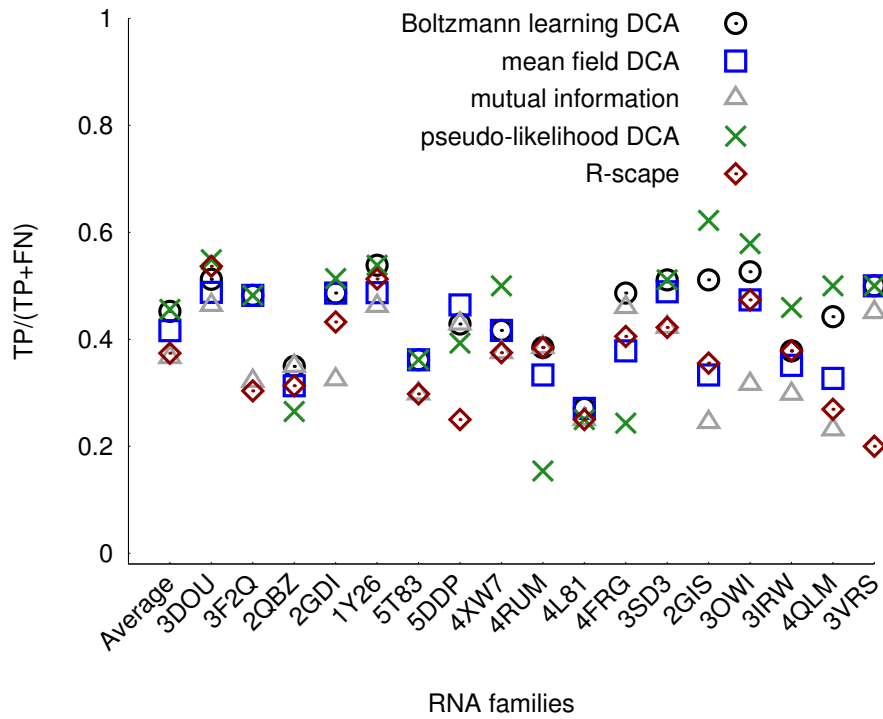

Figure 1: Sensitivity of Boltzmann learning DCA, pseudo-likelihood DCA, mean-field DCA, mutual information and R-scape for all RNA families. Families are labeled using the PDB code of the representative crystallographic structure. Average is reported in first column. Score threshold is obtained through cross-validation procedure. The recommended threshold 0.05 was used for R-scape.

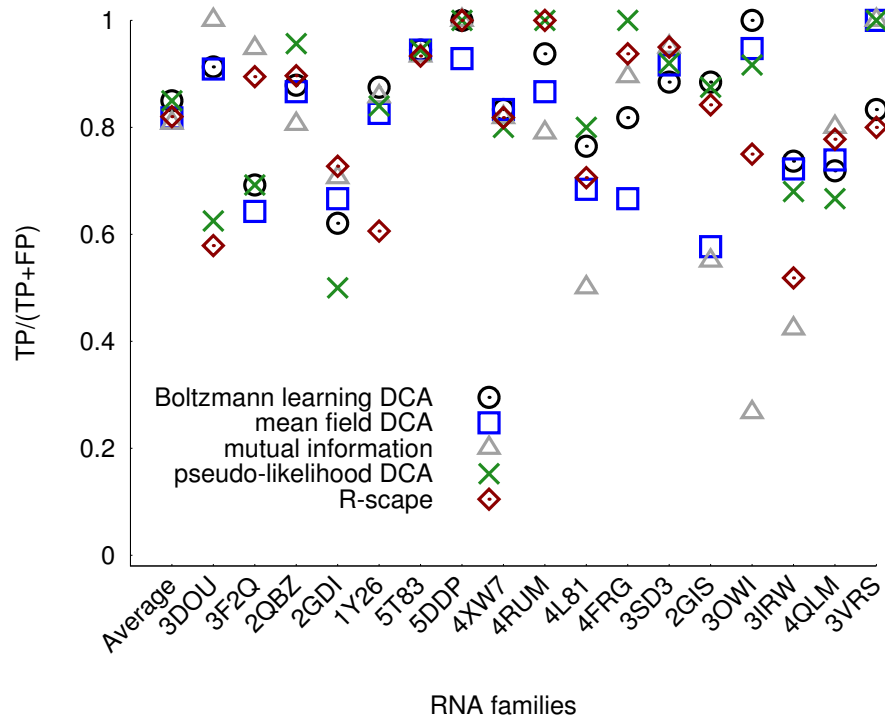

Figure 2: Precision of Boltzmann learning DCA, pseudo-likelihood DCA, mean-field DCA, mutual information and R-scape for all RNA families. Families are labeled using the PDB code of the representative crystallographic structure. Average is reported in first column. Score threshold is obtained through cross-validation procedure. The recommended threshold 0.05 was used for R-scape.

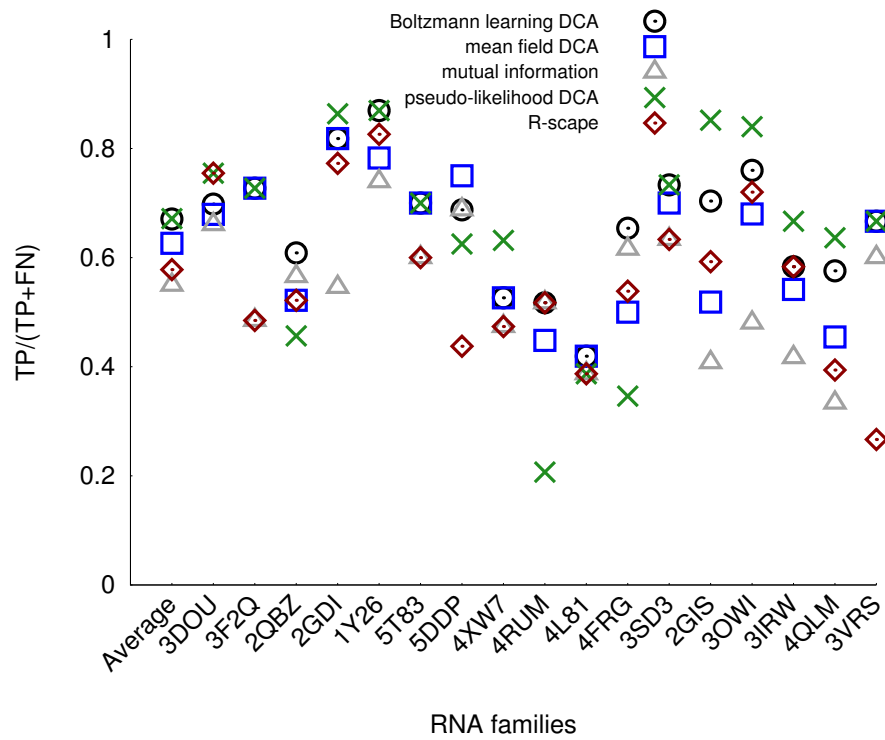

Figure 3: Sensitivity to contacts in stems (RNA secondary structure) of Boltzmann learning DCA, mean field DCA, mutual information and R-scape for all families. Average is reported in first column. Score threshold is obtained through cross-validation procedure. The recommended threshold 0.05 was used for R-scape.

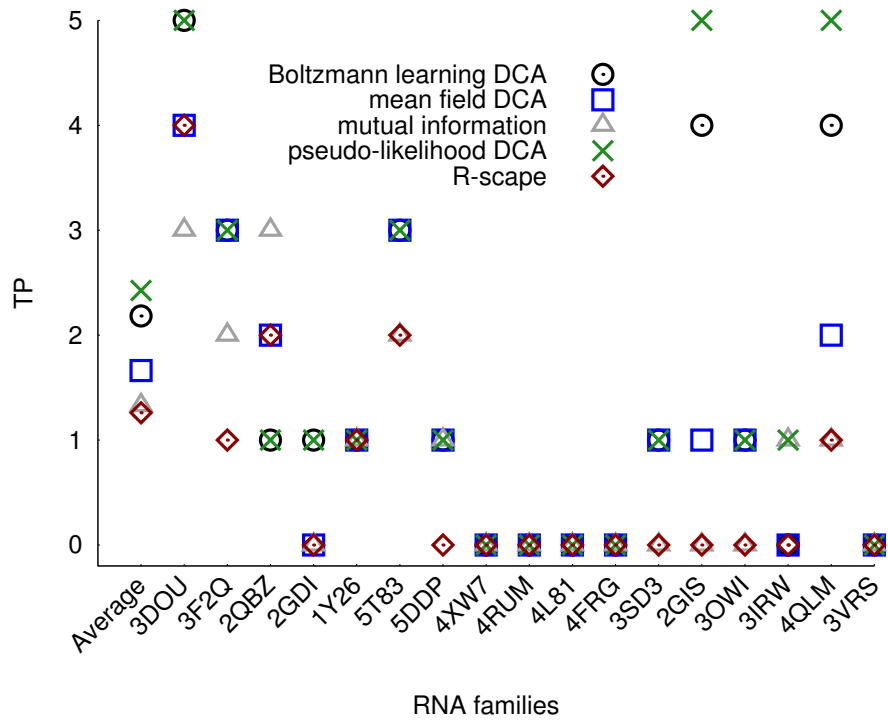

Figure 4: Number of correctly predicted (True Positives) tertiary contacts of Boltzmann learning DCA, mean field DCA, mutual information and R-scape for all RNA families. Average is reported in first column. Score threshold is obtained through cross-validation procedure. The recommended threshold 0.05 was used for R-scape.

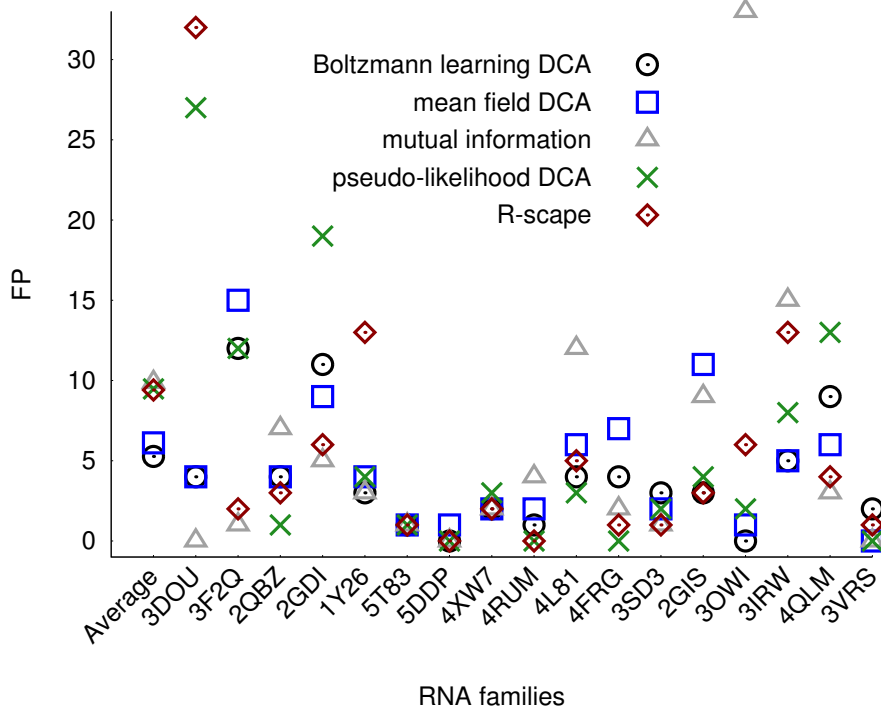

Figure 5: Number of incorrect predictions (False Positives) of Boltzmann learning DCA, pseudo-likelihood DCA, mean-field DCA, mutual information and R-scape for all RNA families. Families are labeled using the PDB code of the representative crystallographic structure. Average is reported in first column. Score threshold is obtained through cross-validation procedure. The recommended threshold 0.05 was used for R-scape.

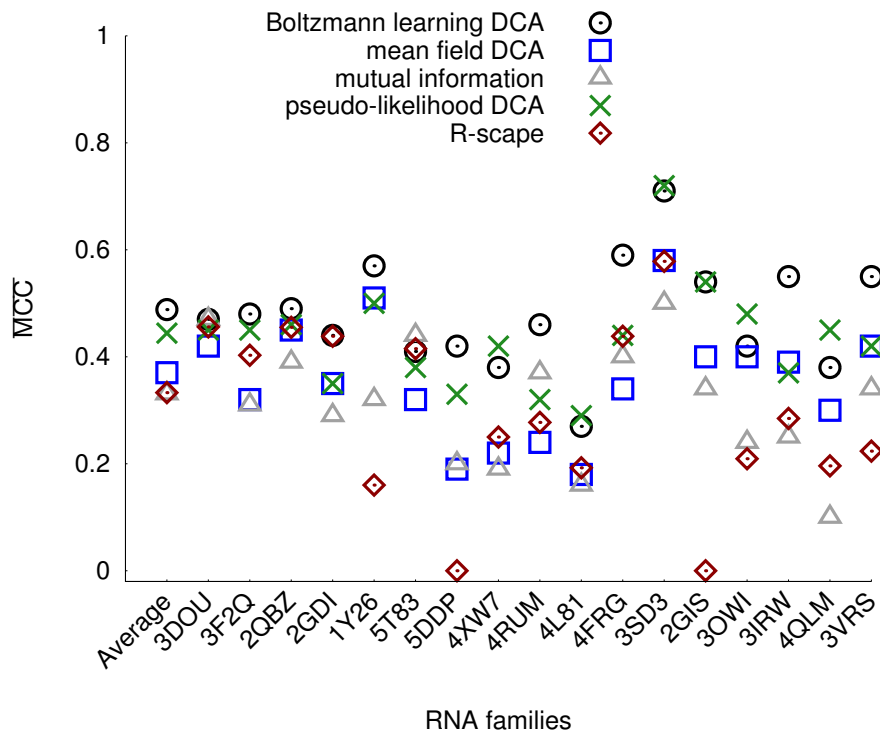

Figure 6: Clustal alignment.  $\overline{MCC}$  of Boltzmann learning DCA, pseudo-likelihood DCA, mean-field DCA, mutual information and R-scape for 17 RNA families at the threshold obtained through cross-validation procedure. Families are labeled using the PDB code of the representative crystallographic structure. Average is reported in first column. Score threshold is obtained through cross-validation procedure. The recommended threshold 0.05 was used for R-scape.

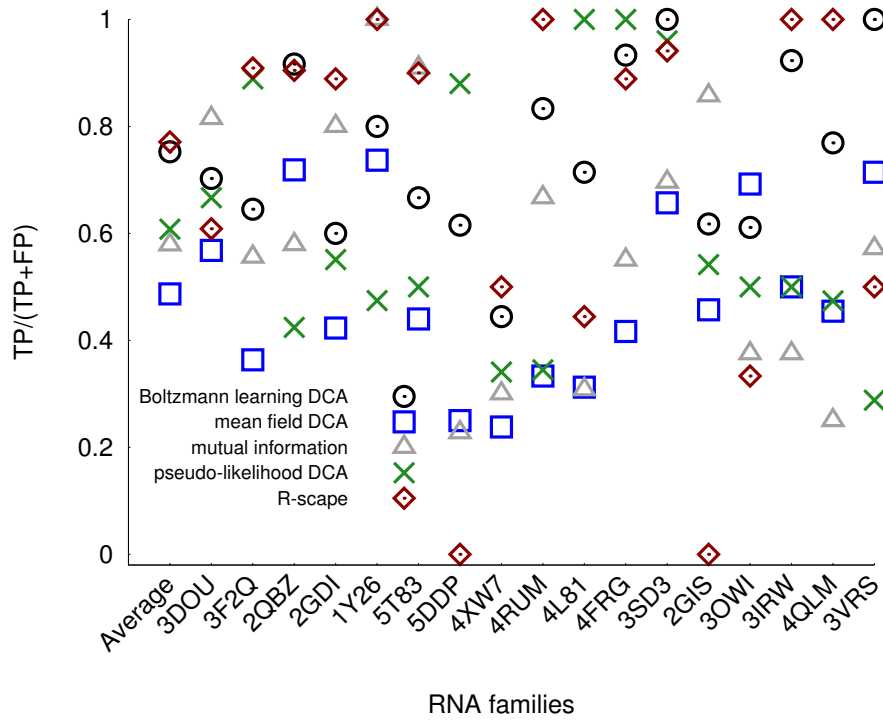

Figure 7: Clustal alignment. Precision of Boltzmann learning DCA, pseudo-likelihood DCA, mean-field DCA mutual information and R-scape for all RNA families. Families are labeled using the PDB code of the representative crystallographic structure. Average is reported in first column. Score threshold is obtained through cross-validation procedure. The recommended threshold 0.05 was used for R-scape.

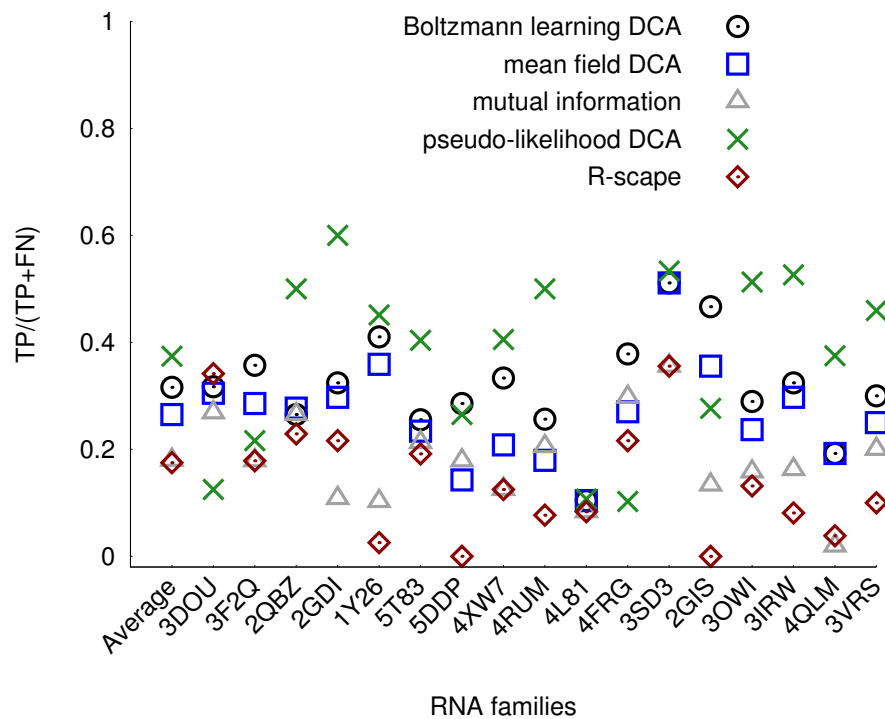

Figure 8: Clustal alignment. Sensitivity of Boltzmann learning DCA, pseudo-likelihood DCA, mean-field DCA mutual information and R-scape for all RNA families. Families are labeled using the PDB code of the representative crystallographic structure. Average is reported in first column. Score threshold is obtained through cross-validation procedure. The recommended threshold 0.05 was used for R-scape.

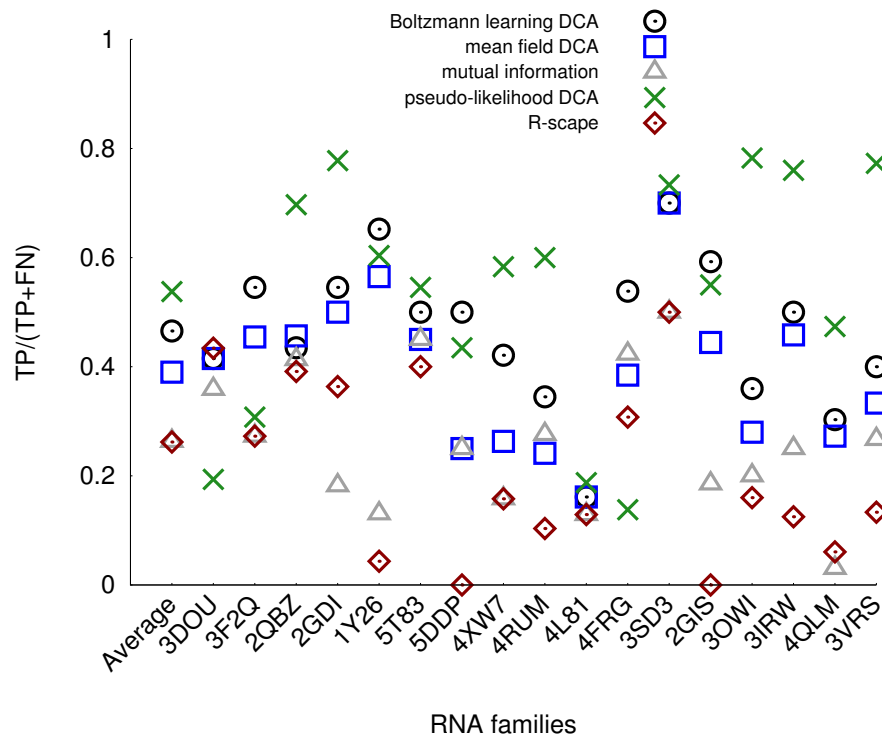

Figure 9: Clustal alignment. Sensitivity to contacts in stems (RNA secondary structure) of Boltzmann learning DCA, mean field DCA, mutual information and R-scape for all families. Average is reported in first column. Score threshold is obtained through cross-validation procedure. The recommended threshold 0.05 was used for R-scape.

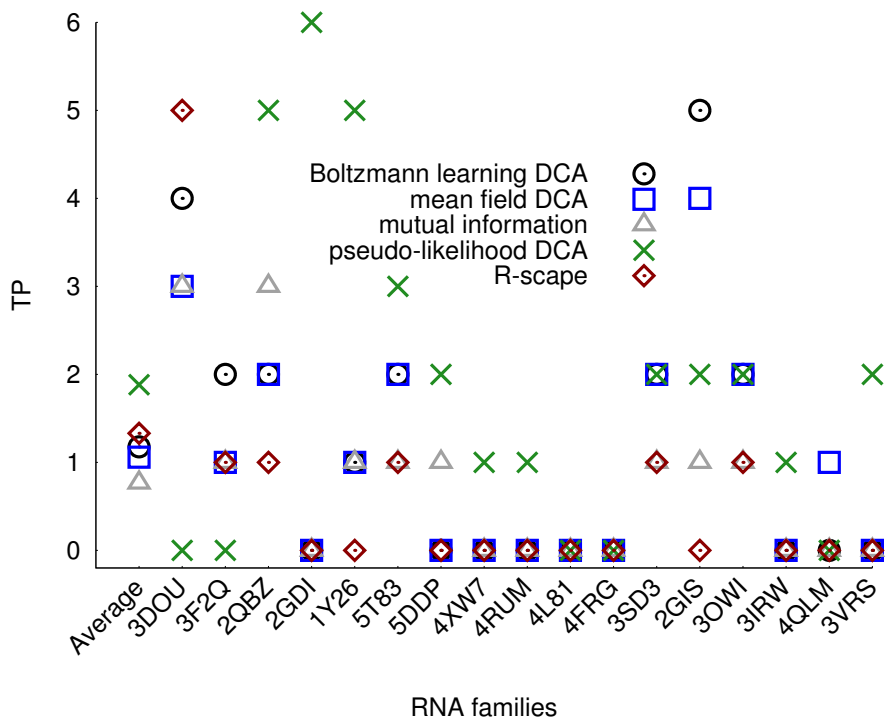

Figure 10: Clustal alignment. Number of correctly predicted (True Positives) tertiary contacts of Boltzmann learning DCA, mean field DCA, mutual information and R-scape for all RNA families. Average is reported in first column. Score threshold is obtained through cross-validation procedure. The recommended threshold 0.05 was used for R-scape.

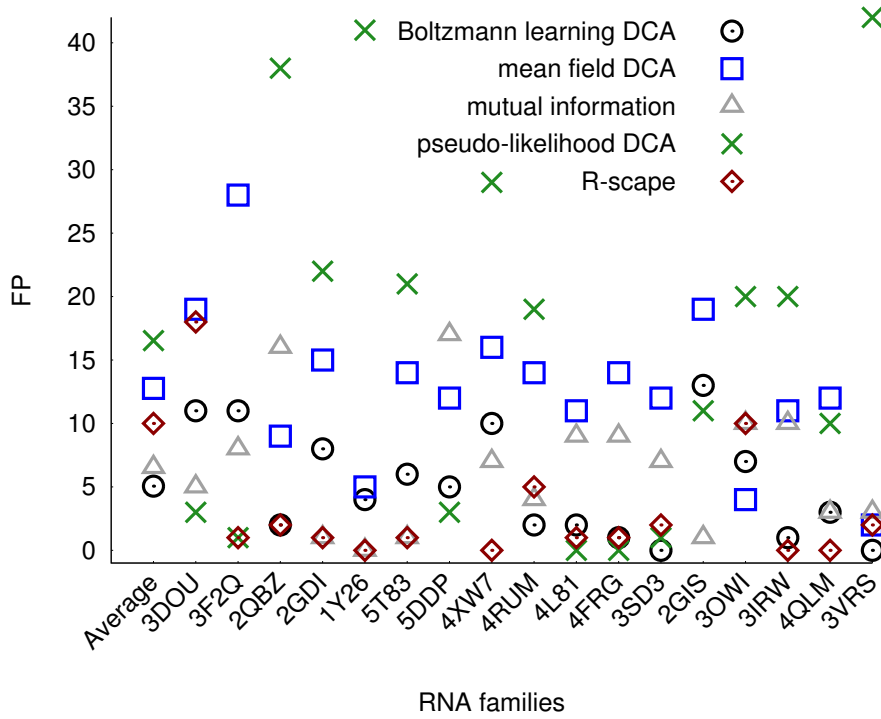

Figure 11: Clustal alignment. Number of incorrect predictions (False Positives) of Boltzmann learning DCA, pseudo-likelihood DCA, mean-field DCA, mutual information and R-scape for all RNA families. Families are labeled using the PDB code of the representative crystallographic structure. Average is reported in first column. Score threshold is obtained through cross-validation procedure. The recommended threshold 0.05 was used for R-scape.

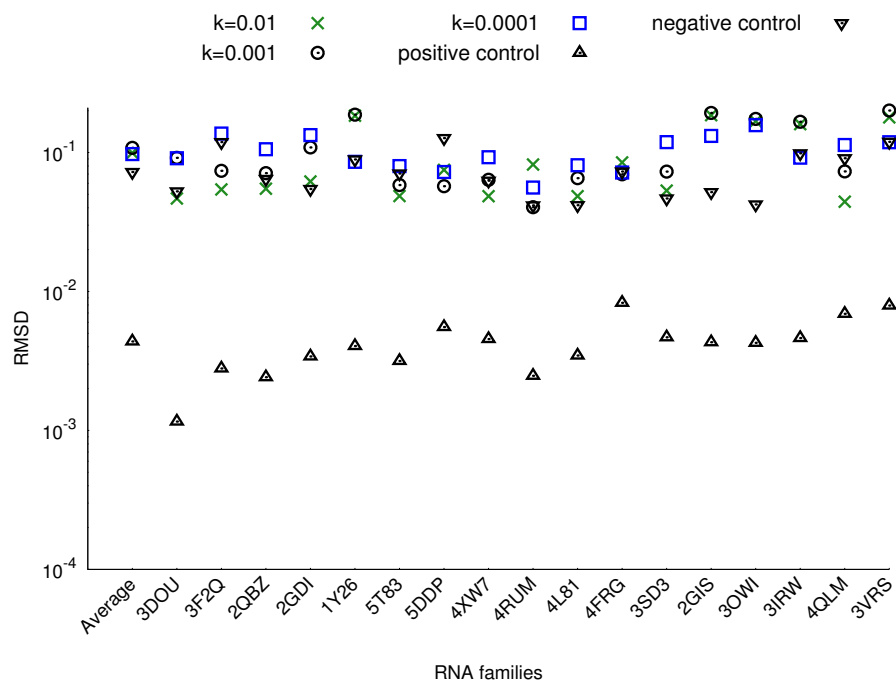

Figure 12: Validation of the coupling parameters inferred via the  $l_2$ -regularized pseudo-likelihood maximization method implemented at <https://github.com/magnusekeberg/plmDCA>, adopting different regularization strengths  $k$ . The validation is done running a parallel MC simulation on 20 sequences and calculating the root-mean-square deviation (RMSD) between the obtained frequencies and the empirical ones. The positive control is the statistical error due to the finite number of sequence, and the negative control is the RMSD between empirical sequences and a random sequence. Infernal alignment.

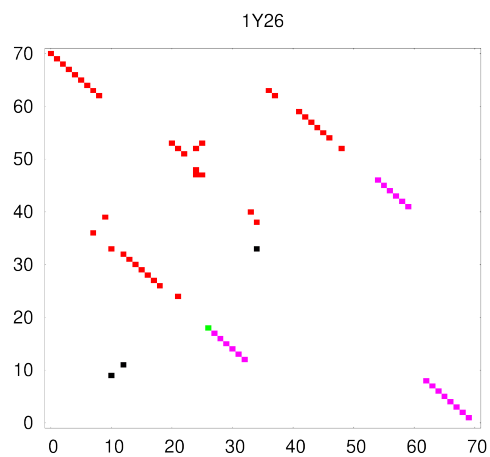

Figure 13: RF00167. Red: native structure base pairs in upper triangle. Magenta: correctly predicted secondary contacts. Green: correctly predicted tertiary contacts. Black: false positives.

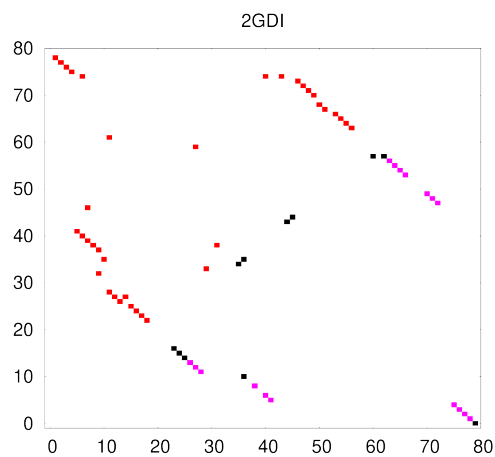

Figure 14: RF00059. Red: native structure base pairs in upper triangle. Magenta: correctly predicted secondary contacts. Green: correctly predicted tertiary contacts. Black: false positives.

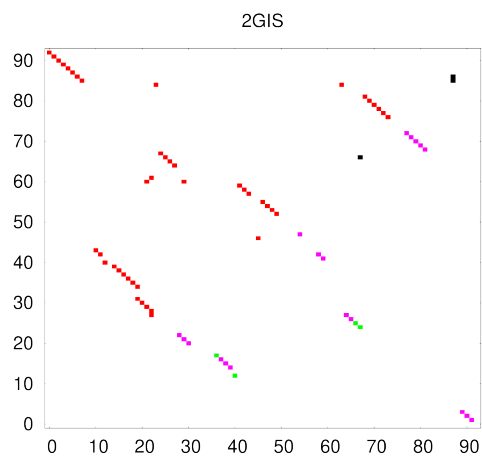

Figure 15: RF00162. Red: native structure base pairs in upper triangle. Magenta: correctly predicted secondary contacts. Green: correctly predicted tertiary contacts. Black: false positives.

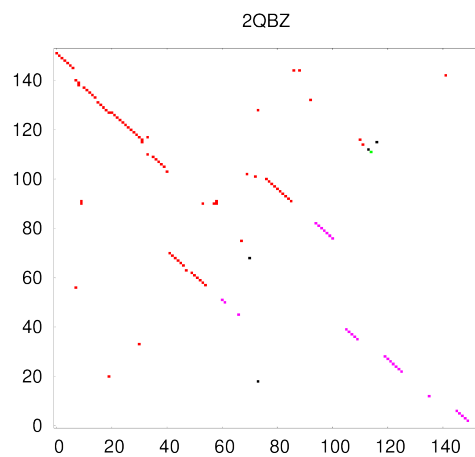

Figure 16: RF00380. Red: native structure base pairs in upper triangle. Magenta: correctly predicted secondary contacts. Green: correctly predicted tertiary contacts. Black: false positives.

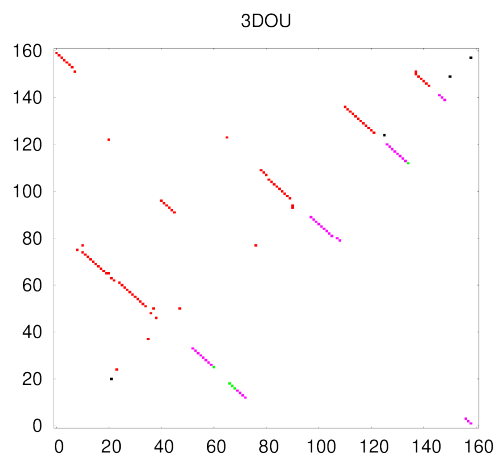

Figure 17: RF00168. Red: native structure base pairs in upper triangle. Magenta: correctly predicted secondary contacts. Green: correctly predicted tertiary contacts. Black: false positives.

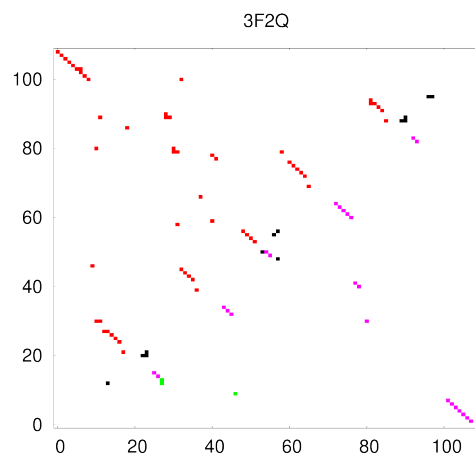

Figure 18: RF00050. Red: native structure base pairs in upper triangle. Magenta: correctly predicted secondary contacts. Green: correctly predicted tertiary contacts. Black: false positives.

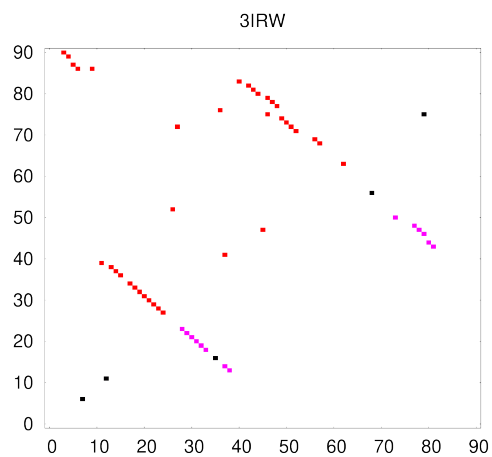

Figure 19: RF01051. Red: native structure base pairs in upper triangle. Magenta: correctly predicted secondary contacts. Green: correctly predicted tertiary contacts. Black: false positives.

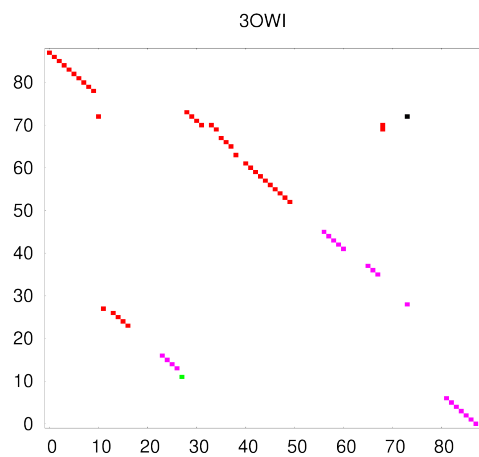

Figure 20: RF00504. Red: native structure base pairs in upper triangle. Magenta: correctly predicted secondary contacts. Green: correctly predicted tertiary contacts. Black: false positives.

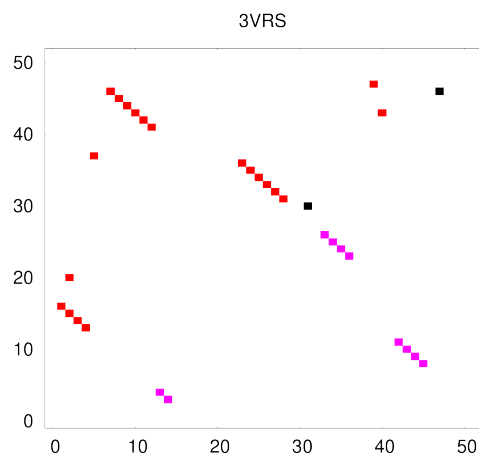

Figure 21: RF01734. Red: native structure base pairs in upper triangle. Magenta: correctly predicted secondary contacts. Green: correctly predicted tertiary contacts. Black: false positives.

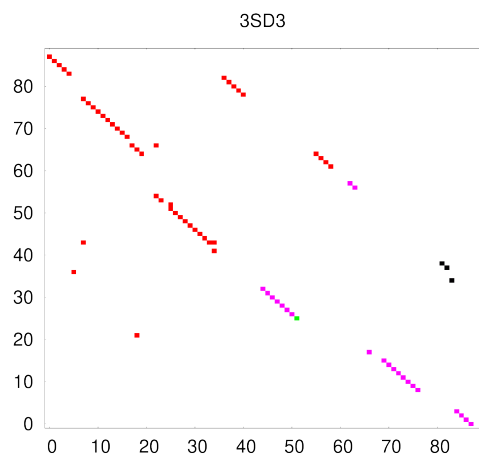

Figure 22: RF01831. Red: native structure base pairs in upper triangle. Magenta: correctly predicted secondary contacts. Green: correctly predicted tertiary contacts. Black: false positives.

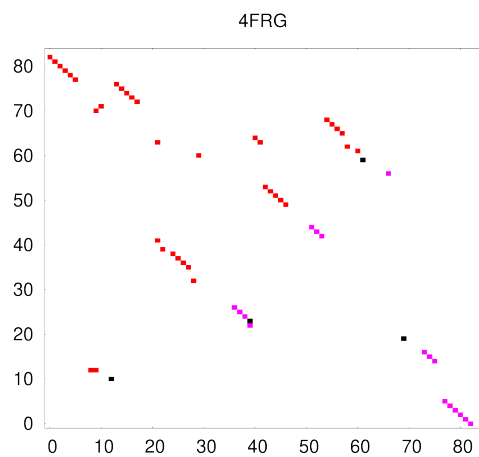

Figure 23: RF01689. Red: native structure base pairs in upper triangle. Magenta: correctly predicted secondary contacts. Green: correctly predicted tertiary contacts. Black: false positives.

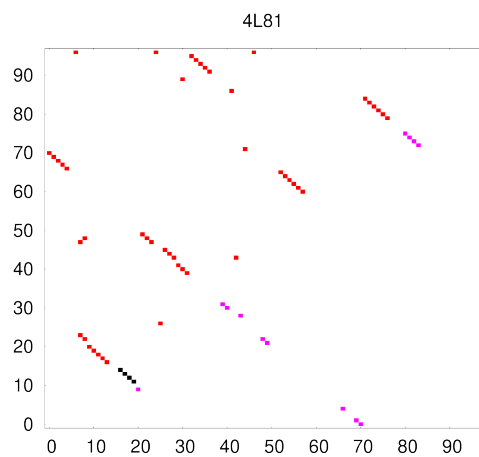

Figure 24: RF01725. Red: native structure base pairs in upper triangle. Magenta: correctly predicted secondary contacts. Green: correctly predicted tertiary contacts. Black: false positives.

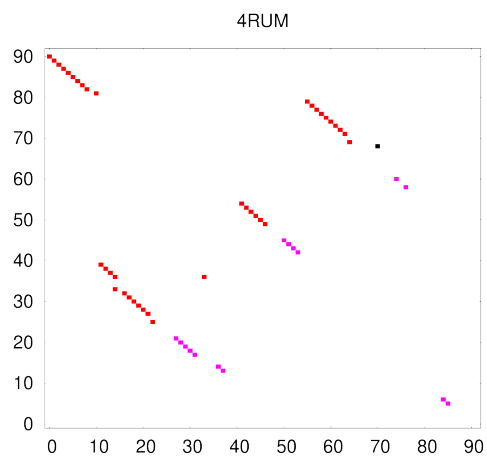

Figure 25: RF02683. Red: native structure base pairs in upper triangle. Magenta: correctly predicted secondary contacts. Green: correctly predicted tertiary contacts. Black: false positives.

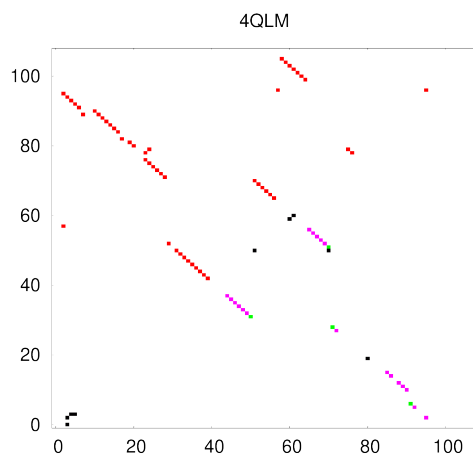

Figure 26: RF00379. Red: native structure base pairs in upper triangle. Magenta: correctly predicted secondary contacts. Green: correctly predicted tertiary contacts. Black: false positives.

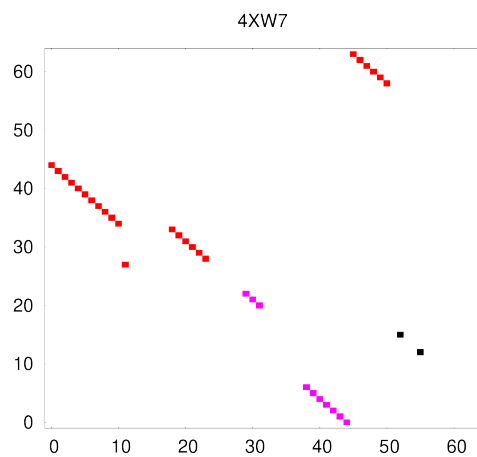

Figure 27: RF01750. Red: native structure base pairs in upper triangle. Magenta: correctly predicted secondary contacts. Green: correctly predicted tertiary contacts. Black: false positives.

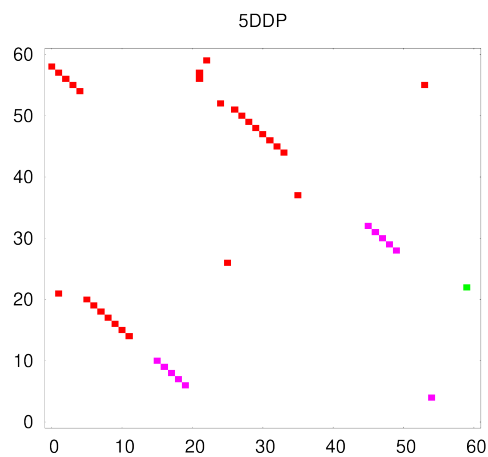

Figure 28: RF01739. Red: native structure base pairs in upper triangle. Magenta: correctly predicted secondary contacts. Green: correctly predicted tertiary contacts. Black: false positives.

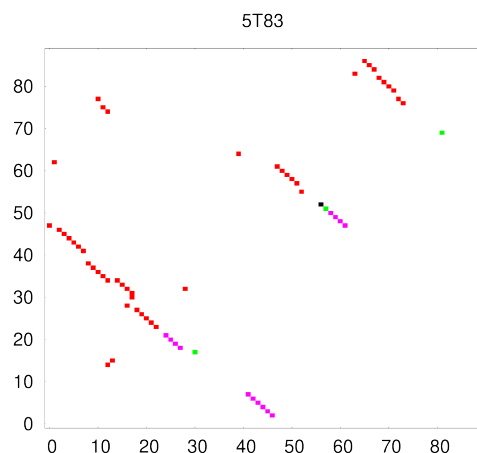

Figure 29: RF00442. Red: native structure base pairs in upper triangle. Magenta: correctly predicted secondary contacts. Green: correctly predicted tertiary contacts. Black: false positives.

## References

- [1] Julie D Thompson, Desmond G Higgins, and Toby J Gibson. CLUSTAL W: improving the sensitivity of progressive multiple sequence alignment through sequence weighting, position-specific gap penalties and weight matrix choice. *Nucleic Acids Res.*, 22(22):4673–4680, 1994.
- [2] Eric P Nawrocki and Sean R Eddy. Infernal 1.1: 100-fold faster RNA homology searches. *Bioinformatics*, 29(22):2933–2935, 2013.
- [3] Eleonora De Leonardis, Benjamin Lutz, Sebastian Ratz, Simona Cocco, Rémi Monasson, Alexander Schug, and Martin Weigt. Direct-coupling analysis of nucleotide coevolution facilitates RNA secondary and tertiary structure prediction. *Nucleic Acids Res.*, 43(21):10444–10455, 2015.
- [4] Faruck Morcos, Andrea Pagnani, Bryan Lunt, Arianna Bertolino, Debora S Marks, Chris Sander, Riccardo Zecchina, José N Onuchic, Terence Hwa, and Martin Weigt. Direct-coupling analysis of residue coevolution captures native contacts across many protein families. *Proc. Natl. Acad. Sci. U. S. A.*, 108(49):E1293–E1301, 2011.
- [5] Simona Cocco, Remi Monasson, and Martin Weigt. From principal component to direct coupling analysis of coevolution in proteins: Low-eigenvalue modes are needed for structure prediction. *PLoS Comput. Biol.*, 9(8):e1003176, 2013.

- [6] Magnus Ekeberg, Tuomo Hartonen, and Erik Aurell. Fast pseudolikelihood maximization for direct-coupling analysis of protein structure from many homologous amino-acid sequences. *J. Comput. Phys.*, 276:341–356, 2014.
- [7] Barry C Arnold and David Strauss. Pseudolikelihood estimation: some examples. *Sankhyā: The Indian Journal of Statistics, Series B*, 53:233–243, 1991.
- [8] Pradeep Ravikumar, Martin J Wainwright, and John D Lafferty. High-dimensional ising model selection using l1-regularized logistic regression. *Ann. Stat.*, 38(3):1287–1319, 2010.
- [9] Martin Weigt, Robert A White, Hendrik Szurmant, James A Hoch, and Terence Hwa. Identification of direct residue contacts in protein–protein interaction by message passing. *Proc. Natl. Acad. Sci. U. S. A.*, 106(1):67–72, 2009.
- [10] Magnus Ekeberg, Cecilia Lövkvist, Yueheng Lan, Martin Weigt, and Erik Aurell. Improved contact prediction in proteins: using pseudolikelihoods to infer potts models. *Phys. Rev. E*, 87(1):012707, 2013.
- [11] Sean R Eddy and Richard Durbin. RNA sequence analysis using covariance models. *Nucleic Acids Res.*, 22(11):2079–2088, 1994.
- [12] Eric P Nawrocki, Sarah W Burge, Alex Bateman, Jennifer Daub, Ruth Y Eberhardt, Sean R Eddy, Evan W Floden, Paul P Gardner, Thomas A Jones, John Tate, et al. Rfam 12.0: updates to the RNA families database. *Nucleic Acids Res.*, 43(D1):D130–D137, 2014.
- [13] Xiang-Jun Lu, Harmen J. Bussemaker, and Wilma K. Olson. DSSR: an integrated software tool for dissecting the spatial structure of RNA. *Nucleic Acids Res.*, 43(21):e142, 2015.
- [14] Neocles B Leontis and Eric Westhof. Geometric nomenclature and classification of RNA base pairs. *RNA*, 7(4):499–512, 2001.
- [15] Neocles B Leontis, Jesse Stombaugh, and Eric Westhof. The non-watson–crick base pairs and their associated isostericity matrices. *Nucleic Acids Res.*, 30(16):3497–3531, 2002.
- [16] Jesse Stombaugh, Craig L Zirbel, Eric Westhof, and Neocles B Leontis. Frequency and isostericity of RNA base pairs. *Nucleic Acids Res.*, 37(7):2294–2312, 2009.
- [17] Stanley D Dunn, Lindi M Wahl, and Gregory B Gloor. Mutual information without the influence of phylogeny or entropy dramatically improves residue contact prediction. *Bioinformatics*, 24(3):333–340, 2007.
- [18] Brian W Matthews. Comparison of the predicted and observed secondary structure of t4 phage lysozyme. *BBA-Prot. Struct.*, 405(2):442–451, 1975.

- [19] Jan Gorodkin, Shawn Stricklin, and Gary Stormo. Discovering common stem-loop motifs in unaligned RNA sequences. *Nucleic Acids Res.*, 29 10:2135–44, 2001.
- [20] Marc Parisien, José Almeida Cruz, Éric Westhof, and François Major. New metrics for comparing and assessing discrepancies between RNA 3D structures and models. *RNA*, 15(10):1875–1885, 2009.
